# Supplementary material for: The clash of the synthons: crystal structures of benzimidazole–alcohol–carboxylic acids
Source: Royal Society of Chemistry journal article supplement (doi:10.1039/b717018a), 2008-01-01
Supplement: b717018a.pdf [file b717018a.pdf]

The Clash of the Synthons: Crystal Structures of Benzimidazole-alcohol  
-carboxylic acids

Franck Delval,<sup>a</sup> Alexandra Spyratou,<sup>a</sup> Simon Verdan,<sup>a</sup> Gerald Bernardinelli<sup>b</sup> and Alan F.  
Williams\*<sup>a</sup>

Supplementary material

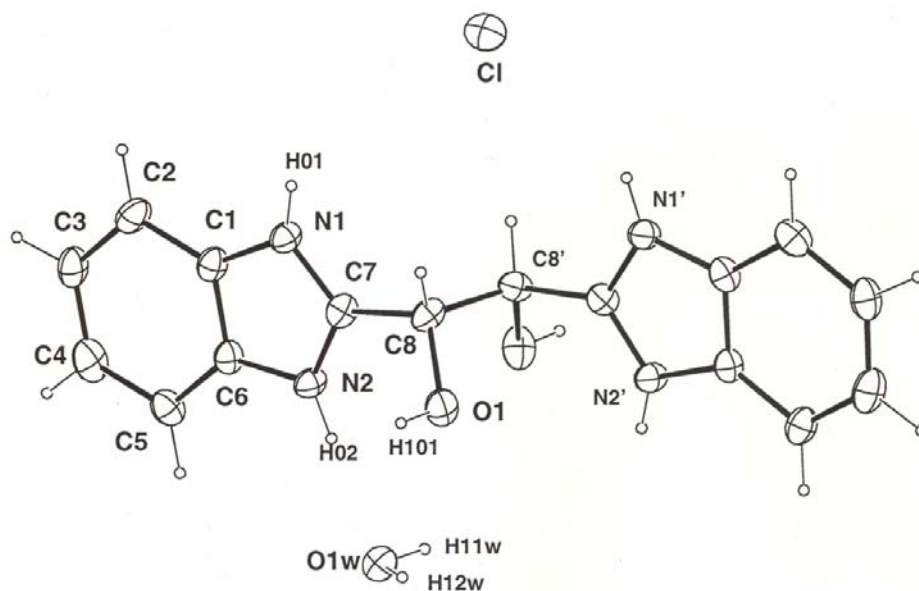

Figure S1 ORTEP plot of *RR*-1H<sub>2</sub>Cl<sub>2</sub>2H<sub>2</sub>O (ellipsoids at 50% probability)

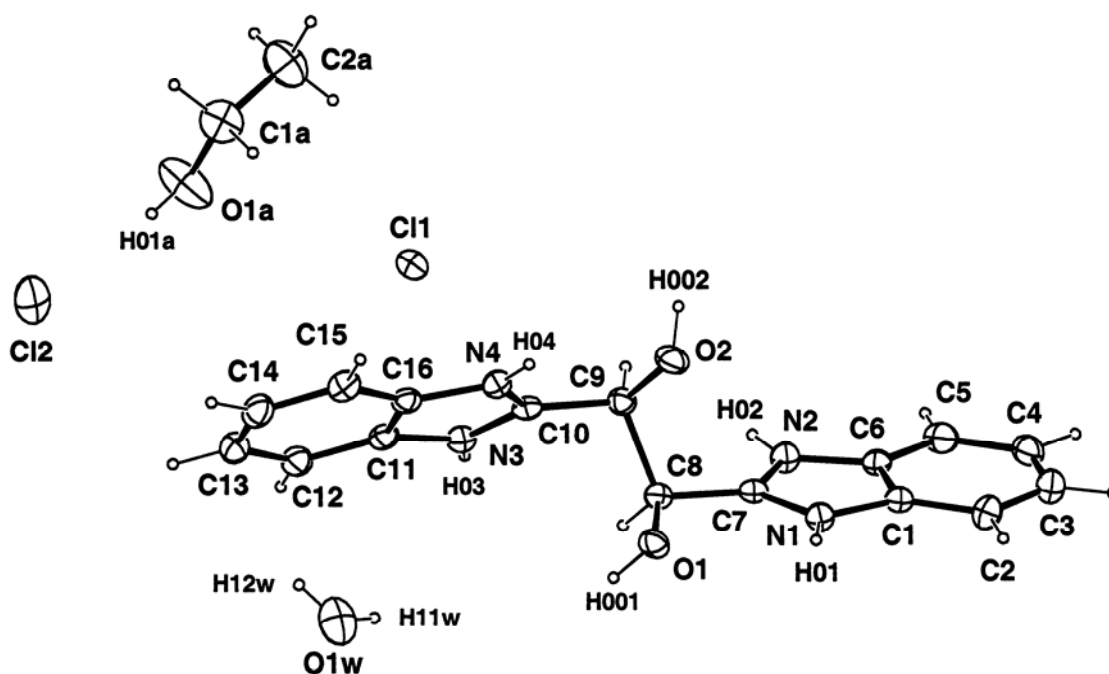

Figure S2 ORTEP plot of (*RR,SS*)-1H<sub>2</sub>Cl<sub>2</sub>H<sub>2</sub>O<sub>et</sub>OH (ellipsoids at 50% probability)

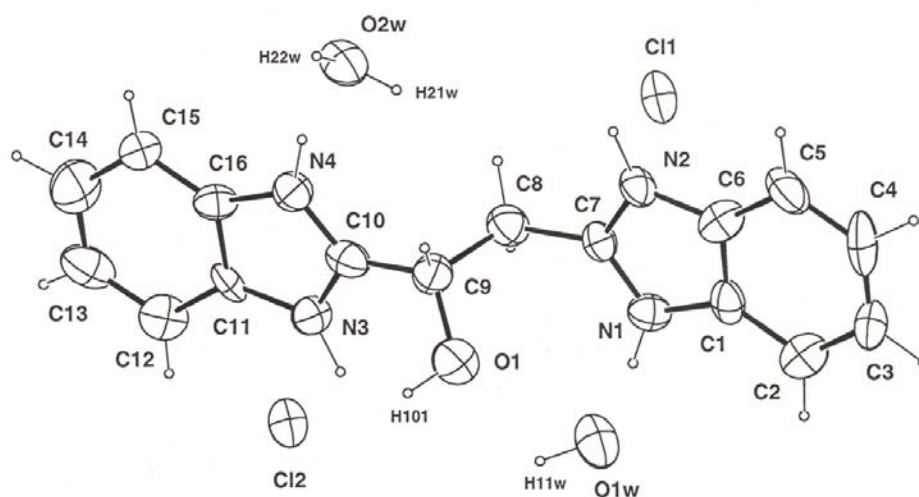

Figure S3 ORTEP plot of  $S-3H_2Cl_2 \cdot 2H_2O$  (ellipsoids at 50% probability)

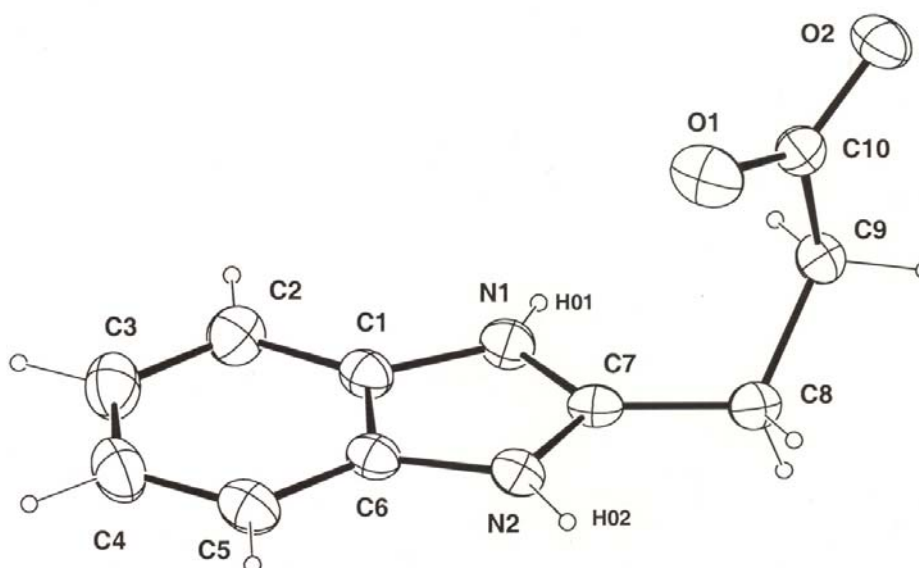

Figure S4 ORTEP plot of **4** (ellipsoids at 50% probability)

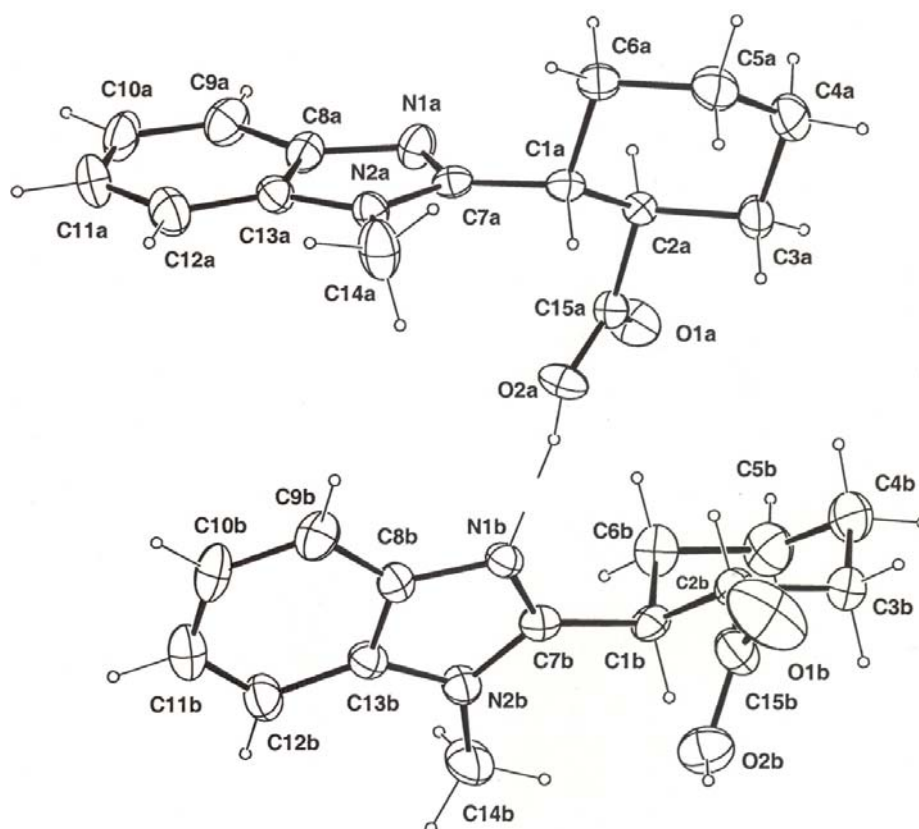

Figure S5 ORTEP plot of *RR-5* (ellipsoids at 50% probability)

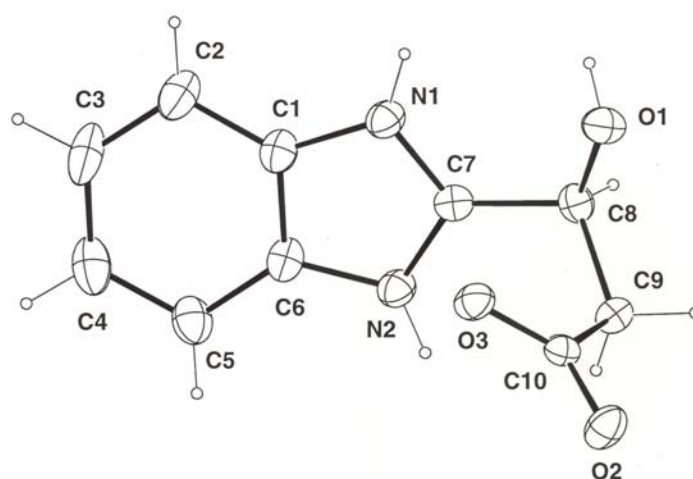

Figure S6 ORTEP plot of *S-6* (ellipsoids at 50% probability)

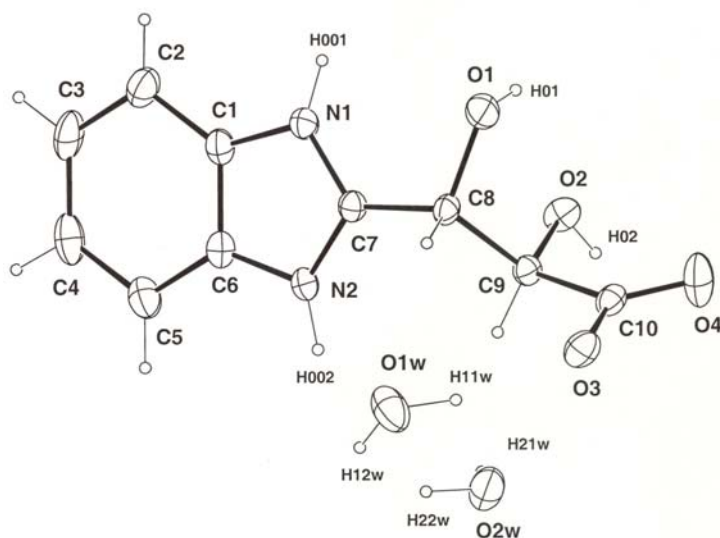

Figure S7 ORTEP plot of *RS-7.2H<sub>2</sub>O* (ellipsoids at 50% probability)

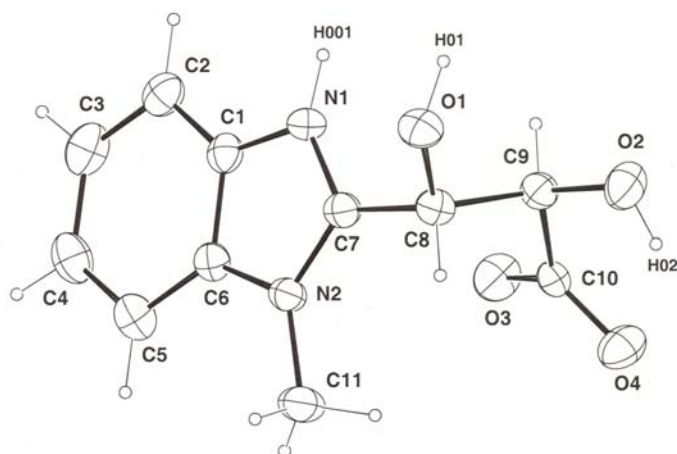

Figure S8 ORTEP plot of *RS-8* (ellipsoids at 50% probability)

Table S1. Data for hydrogen bonds

| Donor, D                                                        | Hydrogen, H | Acceptor, A | D-H, Å   | H...A, Å | D...A, Å  | Angle D-H-A (°) | Equivalent position for A |
|-----------------------------------------------------------------|-------------|-------------|----------|----------|-----------|-----------------|---------------------------|
| <b>[RR-1H<sub>2</sub>]Cl<sub>2</sub>. 2H<sub>2</sub>O</b>       |             |             |          |          |           |                 |                           |
| O1                                                              | H101        | C11         | 0.82(2)  | 2.27(2)  | 3.068(3)  | 165(5)          | x - 1/2, y - 1/2, z       |
| N1                                                              | H01         | O1w         | 0.85(3)  | 1.96(3)  | 2.808(5)  | 170(5)          | x, y + 1, z               |
| N2                                                              | H02         | O1w         | 0.86(3)  | 1.97(3)  | 2.815(5)  | 170(5)          | x, y, z                   |
| O1w                                                             | H11w        | Cl          | 0.86(2)  | 2.23(2)  | 3.084(3)  | 172(5)          | x, y - 1, z               |
| O1w                                                             | H12w        | Cl          | 0.85(3)  | 2.31(3)  | 3.142(3)  | 169(5)          | 1 - x, y - 1, 1 - z       |
| <b>[RR,SS-1H<sub>2</sub>] Cl<sub>2</sub>.H<sub>2</sub>OEtOH</b> |             |             |          |          |           |                 |                           |
| O1                                                              | H001        | C11         | 0.80(3)  | 2.28(3)  | 3.074(1)  | 171(3)          | 1-x, 1-y, 1-z             |
| O2                                                              | H002        | C11         | 0.82(4)  | 2.23(4)  | 3.049(2)  | 177(2)          | -x, 1-y, 1-z              |
| N1                                                              | H01         | Cl2         | 0.87(3)  | 2.31(3)  | 3.124(2)  | 156(2)          | 1-x, 1-y, 1-z             |
| N2                                                              | H02         | Cl2         | 0.88(3)  | 2.20(3)  | 3.082(2)  | 173(2)          | -x, 1-y, 1-z              |
| N3                                                              | H03         | O1a         | 0.87(3)  | 1.87(3)  | 2.702(2)  | 161(3)          | 1-x, -y, 1-z              |
| N4                                                              | H04         | O1w         | 0.84(3)  | 1.98(3)  | 2.775(2)  | 158(3)          | 1-x, 1-y, 1-z             |
| O1a                                                             | H01a        | Cl2         | 0.78(2)  | 2.31(2)  | 3.070(2)  | 166(2)          | x, y, z                   |
| O1w                                                             | H11w        | Cl1         | 0.87(2)  | 2.30(2)  | 3.134(2)  | 160(3)          | 1-x, 1-y, 1-z             |
| <b>[S-3H<sub>2</sub>]Cl<sub>2</sub> 2H<sub>2</sub>O</b>         |             |             |          |          |           |                 |                           |
| O1                                                              | H101        | Cl2         | 0.92(5)  | 2.19(4)  | 3.051(7)  | 158(4)          | x, y, z                   |
| N1                                                              | H01         | O1W         | 0.97     | 1.71     | 2.673(11) | 172             | x, y, z                   |
| N2                                                              | H02         | Cl2         | 0.96     | 2.14     | 3.090(7)  | 172             | 1 - x, 1/2 + y, -z        |
| N3                                                              | H03         | Cl1         | 1.00     | 2.10     | 3.092(7)  | 175             | -x, y - 1/2, -z           |
| N4                                                              | H04         | O2w         | 1.01     | 1.70     | 2.690(11) | 166             | x, y, z                   |
| O1w                                                             | H11w        | Cl1         | 0.90(5)  | 2.38(4)  | 3.227(8)  | 158(6)          | -x, y - 1/2, -z           |
| O1w                                                             | H12w        | Cl2         | 0.90(6)  | 2.29(5)  | 3.165(9)  | 164(5)          | x - 1, y, z               |
| O2w                                                             | H21w        | Cl2         | 0.89(4)  | 2.60(6)  | 3.185(7)  | 125(5)          | 1 - x, 1/2 + y, -z        |
| O2w                                                             | H22w        | Cl1         | 0.89(4)  | 2.24(5)  | 3.079(8)  | 156(5)          | x + 1, y, z               |
| <b>4</b>                                                        |             |             |          |          |           |                 |                           |
| N1                                                              | H01         | O1          | 0.92(2)  | 1.78(2)  | 2.691(2)  | 174(2)          | x, y - 1, z               |
| N2                                                              | H02         | O2          | 1.00(2)  | 1.62(3)  | 2.621(2)  | 177(2)          | x, 5/2 - y, 1/2 + z       |
| <b>RR,SS-5</b>                                                  |             |             |          |          |           |                 |                           |
| O2a                                                             | H02a        | N1b         | 0.89(8)  | 1.77(8)  | 2.638(9)  | 164(10)         | x, y, z                   |
| O2b                                                             | H02b        | N1a         | 0.86(10) | 1.86(10) | 2.679(12) | 160(9)          | x, y - 1, z               |
| <b>S-6</b>                                                      |             |             |          |          |           |                 |                           |
| O1                                                              | H101        | O3          | 0.83(4)  | 1.82(4)  | 2.633(4)  | 165(4)          | 1-x, y - 1/2, 1-z         |
| N1                                                              | H01         | O2          | 0.89     | 1.81     | 2.688(5)  | 169             | 1-x, y - 1/2, 1-z         |
| N2                                                              | H02         | O3          | 0.89     | 1.88     | 2.748(5)  | 166             | x - 1, y, z               |
| <b>2R,3S-7. 2H<sub>2</sub>O</b>                                 |             |             |          |          |           |                 |                           |
| N1                                                              | H001        | O2w         | 0.91(3)  | 1.84(3)  | 2.694(4)  | 156(3)          | 3/2 - x, 2 - y, z - 1/2   |
| N2                                                              | H002        | O3          | 0.91(2)  | 1.92(2)  | 2.765(3)  | 153(4)          | 1 - x, y - 1/2, 3/2 - z   |
| O1                                                              | H01         | O2          | 0.90(2)  | 2.19(5)  | 2.654(3)  | 111(5)          | x, y, z                   |
| O2                                                              | H02         | O1w         | 0.88(2)  | 1.80(2)  | 2.674(3)  | 170(3)          | x + 1, y, z               |
| O1w                                                             | H11w        | O3          | 0.91(3)  | 1.90(3)  | 2.798(3)  | 167(4)          | x, y, z                   |
| O1w                                                             | H12w        | O4          | 0.90(3)  | 1.86(3)  | 2.752(3)  | 168(3)          | 1 - x, y - 1/2, 3/2 - z   |
| O2w                                                             | H21w        | O4          | 0.90(3)  | 1.88(2)  | 2.706(3)  | 151(3)          | 2 - x, y - 1/2, 3/2 - z   |
| O2w                                                             | H22w        | O3          | 0.90(3)  | 1.86(3)  | 2.759(3)  | 176(4)          | 1 - x, y - 1/2, 3/2 - z   |
| <b>2R,3S-8</b>                                                  |             |             |          |          |           |                 |                           |

---

|    |      |    |         |         |          |        |                        |
|----|------|----|---------|---------|----------|--------|------------------------|
| N1 | H001 | O4 | 0.91(4) | 1.68(4) | 2.594(4) | 175(4) | $x^{-1/2}, 1/2-y, 1-z$ |
| O1 | H01  | O3 | 0.97(4) | 1.75(4) | 2.700(4) | 167(4) | $x^{-1/2}, 1/2-y, 1-z$ |
| O2 | H02  | O4 | 0.84(4) | 2.05(4) | 2.616(4) | 124(4) | $x, y, z$              |

---
